## Articles of interest in other COB journals

### From *Journal of Cell Science*

#### **Effect of cell shape and packing density on granulosa cell proliferation and formation of multiple layers during early follicle development in the ovary**

Patricia Da Silva-Buttkus, Gayani S. Jayasooriya, Jocelyn M. Mora, Margaret Mobberley, Timothy A. Ryder, Marianne Baithun, Jaroslav Stark, Stephen Franks and Kate Hardy

Da Silva-Buttkus, P. et al. 2008. *J. Cell Sci.* doi: 10.1242/jcs.036400

#### **TRPC1 regulates skeletal myoblast migration and differentiation**

Magali Louis, Nadège Zanou, Monique Van Schoor and Philippe Gailly

Louis, M. et al. 2008. *J. Cell Sci.* doi: 10.1242/jcs.037218
